# Supplementary material for: Deep immune profiling reveals targetable mechanisms of immune evasion in immune checkpoint inhibitor-refractory glioblastoma
Source: PubMed Central journal article supplement (PMC8183210; doi:10.1136/jitc-2020-002181), 2021-06-02
Supplement: jitc-2020-002181supp002.pdf [file jitc-2020-002181supp002.pdf]

**Table S1 – Patient Details**

| Patient ID       | Year of collection | Patient sex | Patient age | Diagnosis      | Tissue type             | EGFR gene amplification |
|------------------|--------------------|-------------|-------------|----------------|-------------------------|-------------------------|
| SF10711          | 2016               | M           | 58          | Astro Grade II | Primary tumor biopsy    | Not tested              |
| SF10941          | 2016               | M           | 48          | GBM            | Primary tumor biopsy    | Yes                     |
| SF10953          | 2016               | M           | 37          | GBM            | Primary tumor biopsy    | No                      |
| SF10985          | 2016               | M           | 38          | Adult GBM      | Primary tumor biopsy    | No                      |
| SF10986          | 2016               | F           | 52          | GBM            | Primary tumor biopsy    | No                      |
| SF11048          | 2016               | M           | 71          | GBM            | Primary tumor biopsy    | Yes                     |
| SF11071          | 2016               | M           | 66          | GBM            | Primary tumor biopsy    | Yes                     |
| SF11159          | 2017               | M           | 60          | GBM            | Primary tumor biopsy    | No                      |
| SF11232          | 2017               | M           | 61          | GBM            | Primary tumor biopsy    | No                      |
| SF11318A         | 2017               | M           | 55          | GBM            | Primary tumor biopsy    | No                      |
| SF11331          | 2017               | M           | 55          | GBM            | Primary tumor biopsy    | No                      |
| SF11378          | 2017               | M           | 53          | GBM            | Primary tumor biopsy    | Not tested              |
| SF11447          | 2017               | M           | 60          | HGG            | Primary tumor biopsy    | No                      |
| SF11496          | 2017               | M           | 43          | GBM            | Primary tumor biopsy    | No                      |
| SF11503          | 2017               | M           | 76          | GBM            | Primary tumor biopsy    | No                      |
| SF11512          | 2017               | M           | 29          | GBM            | Primary tumor biopsy    | No                      |
| SF11517          | 2017               | F           | 54          | GBM            | Primary tumor biopsy    | Yes                     |
| SF11723          | 2018               | F           | 27          | GBM            | Primary tumor biopsy    | No                      |
| COH001           | 2017               | M           | 16          | GBM            | Primary tumor biopsy    | Not tested              |
| IPIKID-97 T1     | 2017               | F           | 44          | Kidney cancer  | Primary tumor biopsy    | Not tested              |
| CIPSOCKID-01 T1  | NA                 | NA          | NA          | Kidney cancer  | Primary tumor biopsy    | Not tested              |
| IPIKID-103       | 2017               | M           | 65          | Kidney cancer  | Primary tumor biopsy    | Not tested              |
| IPIKID-073       | 2017               | M           | 60          | Kidney cancer  | Primary tumor biopsy    | Not tested              |
| IPIKID-111 T1    | 2017               | M           | 27          | Kidney cancer  | Primary tumor biopsy    | Not tested              |
| IPIKID-076       | NA                 | NA          | NA          | Kidney cancer  | Primary tumor biopsy    | Not tested              |
| IPIKID-109 T1    | 2017               | M           | 84          | Kidney cancer  | Primary tumor biopsy    | Not tested              |
| CIPSOCKID-05 T1  | 2018               | NA          | NA          | Kidney cancer  | Primary tumor biopsy    | Not tested              |
| CIPSOCKID-06 T1  | 2018               | NA          | NA          | Kidney cancer  | Primary tumor biopsy    | Not tested              |
| IPIKID-100       | 2017               | F           | 79          | Kidney cancer  | Primary tumor biopsy    | Not tested              |
| IPIKID-101       | NA                 | NA          | NA          | Kidney cancer  | Primary tumor biopsy    | Not tested              |
| CIPSOCKID-010 N1 | 2018               | NA          | NA          | Kidney cancer  | Normal adjacent tissue  | Not tested              |
| CIPSOCKID-010 T1 | 2018               | NA          | NA          | Kidney cancer  | Primary tumor biopsy    | Not tested              |
| CIPSOCKID-010 M1 | 2018               | NA          | NA          | Kidney cancer  | Metastatic tumor biopsy | Not tested              |
| IPISRC-09        | NA                 | NA          | NA          | Sarcoma        | Primary tumor biopsy    | Not tested              |
| IPISRC-013 N1    | NA                 | NA          | NA          | Sarcoma        | Normal adjacent tissue  | Not tested              |
| IPISRC-013 T1    | NA                 | NA          | NA          | Sarcoma        | Primary tumor biopsy    | Not tested              |
| IPISRC-016       | 2017               | NA          | NA          | Sarcoma        | Primary tumor biopsy    | Not tested              |
| IPISRC-10        | NA                 | NA          | NA          | Sarcoma        | Primary tumor biopsy    | Not tested              |

NA: Data not available

**Table S2 – Human T Cell CyTOF Antibody Panel**

| Channel | Marker                     | Staining step  | Manufacturer   | Clone    | Staining Concentration (µg/mL) | Used for clustering | Notes                                                             |
|---------|----------------------------|----------------|----------------|----------|--------------------------------|---------------------|-------------------------------------------------------------------|
| 89      | CD45                       | After Fc block | Fluidigm       | HI30     | --                             | Yes                 |                                                                   |
| 102     | Cell-ID 20-plex Pd barcode | After thaw     | Fluidigm       | --       | --                             | No                  |                                                                   |
| 104     | Cell-ID 20-plex Pd barcode | After thaw     | Fluidigm       | --       | --                             | No                  |                                                                   |
| 105     | Cell-ID 20-plex Pd barcode | After thaw     | Fluidigm       | --       | --                             | No                  |                                                                   |
| 106     | Cell-ID 20-plex Pd barcode | After thaw     | Fluidigm       | --       | --                             | No                  |                                                                   |
| 108     | Cell-ID 20-plex Pd barcode | After thaw     | Fluidigm       | --       | --                             | No                  |                                                                   |
| 110     | Cell-ID 20-plex Pd barcode | After thaw     | Fluidigm       | --       | --                             | No                  |                                                                   |
| 113     | CD235ab                    | After Fc block | BioLegend      | HIR2     | 1                              | Yes                 | Two antibodies on same channel as dump for platelets/erythrocytes |
| 113     | CD61                       | After Fc block | BioLegend      | C1-PL2   | 1                              | Yes                 | Two antibodies on same channel as dump for platelets/erythrocytes |
| 115     | CD44                       | After Fc block | BioLegend      | IM77     | 1                              | Yes                 |                                                                   |
| 139     | Unused                     | --             | --             | --       | --                             | Yes                 | Empty channel                                                     |
| 140     | CD66                       | After Fc block | BD Biosciences | b1.1     | 3                              | Yes                 |                                                                   |
| 141     | CD16                       | After Fc block | BioLegend      | 3G8      | 1                              | Yes                 |                                                                   |
| 142     | TCR Vd2                    | After Fc block | BioLegend      | B6       | 2                              | Yes                 |                                                                   |
| 143     | CD45RA                     | After Fc block | Fluidigm       | HI100    | (1:100)                        | Yes                 |                                                                   |
| 144     | CTLA-4                     | After Perm-S   | eBioscience    | 14D3     | 1                              | Yes                 |                                                                   |
| 145     | CD4                        | After Fc block | Fluidigm       | RPA-T4   | (1:100)                        | Yes                 |                                                                   |
| 146     | CD8a                       | After Fc block | Fluidigm       | RPA-T8   | (1:100)                        | Yes                 |                                                                   |
| 147     | CD11c                      | After Fc block | Fluidigm       | Bu15     | (1:100)                        | Yes                 |                                                                   |
| 148     | ICOS                       | After Fc block | BioLegend      | C398.4A  | 2                              | Yes                 |                                                                   |
| 149     | CD45RO                     | After Fc block | Fluidigm       | UCHL1    | (1:100)                        | Yes                 |                                                                   |
| 150     | LAG-3                      | After Fc block | Fluidigm       | 874501   | (1:100)                        | Yes                 |                                                                   |
| 151     | CD14                       | After Fc block | Fluidigm       | M5E2     | (1:100)                        | Yes                 |                                                                   |
| 152     | TCRVδ                      | After Fc block | BioLegend      | B1       | 3                              | Yes                 |                                                                   |
| 153     | TIM-3                      | After Fc block | Fluidigm       | F38.2E2  | (1:100)                        | Yes                 |                                                                   |
| 154     | TIGIT                      | After Fc block | Fluidigm       | MBSA43   | (1:100)                        | Yes                 |                                                                   |
| 155     | PD-1                       | After Fc block | Fluidigm       | EH12.2H7 | (1:100)                        | Yes                 |                                                                   |
| 156     | Vimentin                   | After Fc block | Fluidigm       | RV202    | (1:100)                        | Yes                 |                                                                   |
| 157     | Epcam                      | After Fc block | BioLegend      | 9C4      | 1                              | Yes                 |                                                                   |
| 158     | CD135 (OX40)               | After Fc block | Fluidigm       | ACT35    | (1:100)                        | Yes                 |                                                                   |
| 159     | CD137 (4-1BB)              | After Fc block | BioLegend      | 4B4-1    | 2                              | Yes                 |                                                                   |
| 160     | ECMES                      | After Perm-S   | eBioscience    | WD1928   | 2                              | Yes                 |                                                                   |
| 161     | T-bet                      | After Perm-S   | Fluidigm       | 4B10     | (1:100)                        | Yes                 |                                                                   |
| 162     | FoxP3                      | After Perm-S   | Fluidigm       | PCH101   | (1:100)                        | Yes                 |                                                                   |
| 163     | BTLA                       | After Fc block | Fluidigm       | MIH26    | (1:100)                        | Yes                 |                                                                   |
| 164     | CD161 (KLRB1)              | After Fc block | Fluidigm       | HP-3G10  | (1:100)                        | Yes                 |                                                                   |
| 165     | VISTA                      | After Fc block | R&D Systems    | 730804   | 4                              | Yes                 |                                                                   |
| 166     | NKG2D                      | After Fc block | Fluidigm       | ON72     | (1:100)                        | Yes                 |                                                                   |
| 167     | CD27                       | After Fc block | Fluidigm       | L128     | (1:100)                        | Yes                 |                                                                   |
| 168     | CD127 (IL-7Ra)             | After Fc block | Fluidigm       | A019D5   | (1:100)                        | Yes                 |                                                                   |
| 169     | CD25                       | After Fc block | Fluidigm       | 2A3      | (1:100)                        | Yes                 |                                                                   |
| 170     | CD3                        | After Fc block | Fluidigm       | UCHT1    | (1:100)                        | Yes                 |                                                                   |
| 171     | GITR                       | After Fc block | BioLegend      | 621      | 8                              | Yes                 |                                                                   |
| 172     | Ki-67                      | After Perm-S   | Fluidigm       | B56      | (1:100)                        | Yes                 |                                                                   |
| 173     | Granzyme B                 | After Perm-S   | ThermoFisher   | CLB-B11  | 1                              | Yes                 |                                                                   |
| 174     | HLA-DR                     | After Fc block | Fluidigm       | L243     | (1:100)                        | Yes                 |                                                                   |
| 175     | PD-L1                      | After Fc block | Fluidigm       | 29E2A3   | (1:100)                        | Yes                 |                                                                   |
| 176     | CD56                       | After Fc block | Fluidigm       | NCAM16.1 | (1:100)                        | Yes                 |                                                                   |
| 191     | DNA                        | Final step     | Fluidigm       | --       | --                             | No                  | Ir-intercalator                                                   |
| 193     | DNA                        | Final step     | Fluidigm       | --       | --                             | No                  | Ir-intercalator                                                   |
| 194     | Viability                  | Before PFA     | Fluidigm       | --       | --                             | No                  | Cisplatin                                                         |
| 195     | Viability                  | Before PFA     | Fluidigm       | --       | --                             | No                  | Cisplatin                                                         |
| 198     | Viability                  | Before PFA     | Fluidigm       | --       | --                             | No                  | Cisplatin                                                         |
| 209     | CD11b                      | After Fc block | Fluidigm       | ICRF44   | (1:100)                        | Yes                 |                                                                   |

**Table S3 – Human Myeloid CyTOF Antibody Panel**

| Channel | Marker                     | Staining step  | Manufacturer   | Clone          | Staining Concentration (µg/mL) | Used for clustering | Notes                                                             |
|---------|----------------------------|----------------|----------------|----------------|--------------------------------|---------------------|-------------------------------------------------------------------|
| 89      | CD45                       | After Fc block | Fluidigm       | HI30           | --                             | Yes                 |                                                                   |
| 102     | Cell-ID 20-plex Pd barcode | After thaw     | Fluidigm       | --             | --                             | No                  |                                                                   |
| 104     | Cell-ID 20-plex Pd barcode | After thaw     | Fluidigm       | --             | --                             | No                  |                                                                   |
| 105     | Cell-ID 20-plex Pd barcode | After thaw     | Fluidigm       | --             | --                             | No                  |                                                                   |
| 106     | Cell-ID 20-plex Pd barcode | After thaw     | Fluidigm       | --             | --                             | No                  |                                                                   |
| 108     | Cell-ID 20-plex Pd barcode | After thaw     | Fluidigm       | --             | --                             | No                  |                                                                   |
| 110     | Cell-ID 20-plex Pd barcode | After thaw     | Fluidigm       | --             | --                             | No                  |                                                                   |
| 113     | CD235ab                    | After Fc block | BioLegend      | HIR2           | 1                              | Yes                 | Two antibodies on same channel as dump for platelets/erythrocytes |
| 113     | CD61                       | After Fc block | BioLegend      | C1-PL2         | 1                              | Yes                 | Two antibodies on same channel as dump for platelets/erythrocytes |
| 115     | CD44                       | After Fc block | BioLegend      | IM77           | 1                              | Yes                 |                                                                   |
| 139     | Unused                     | --             | --             | --             | --                             | Yes                 | Empty channel                                                     |
| 140     | CD66                       | After Fc block | BD Biosciences | B1.1           | 3                              | Yes                 |                                                                   |
| 141     | CD16                       | After Fc block | BioLegend      | 3G8            | 1                              | Yes                 |                                                                   |
| 142     | CD123                      | After Fc block | BioLegend      | 6H6            | 4                              | Yes                 |                                                                   |
| 143     | CD117                      | After Fc block | Fluidigm       | 104D2          | (1:100)                        | Yes                 |                                                                   |
| 144     | CD15                       | After Fc block | Fluidigm       | W6D3           | (1:100)                        | Yes                 |                                                                   |
| 145     | CD4                        | After Fc block | Fluidigm       | RPA-T4         | (1:100)                        | Yes                 |                                                                   |
| 146     | CD8a                       | After Fc block | Fluidigm       | RPA-T8         | (1:100)                        | Yes                 |                                                                   |
| 147     | CD303 (BDCA2)              | After Fc block | Fluidigm       | 201A           | (1:100)                        | Yes                 |                                                                   |
| 148     | ICOS                       | After Fc block | BioLegend      | C398.4A        | 2                              | Yes                 |                                                                   |
| 149     | BDCA1                      | After Fc block | BioLegend      | L161           | 2                              | Yes                 |                                                                   |
| 150     | FceR1a                     | After Fc block | Fluidigm       | AER-37 (CRA-1) | (1:100)                        | Yes                 |                                                                   |
| 151     | CD14                       | After Fc block | Fluidigm       | M5E2           | (1:100)                        | Yes                 |                                                                   |
| 152     | ULBP-2                     | After Fc block | R&D Systems    | 165903         | 0.5                            | Yes                 |                                                                   |
| 153     | CD7                        | After Fc block | Fluidigm       | CD7-6B7        | (1:100)                        | Yes                 |                                                                   |
| 154     | CD163                      | After Fc block | Fluidigm       | GHI61          | (1:100)                        | Yes                 |                                                                   |
| 155     | PD-1                       | After Fc block | Fluidigm       | EH12.2H7       | (1:100)                        | Yes                 |                                                                   |
| 156     | PDGFRb                     | After Fc block | Fluidigm       | 18A2           | (1:100)                        | Yes                 |                                                                   |
| 157     | Epcam                      | After Fc block | BioLegend      | 9C4            | 1                              | Yes                 |                                                                   |
| 158     | CD33                       | After Fc block | Fluidigm       | WM53           | (1:100)                        | Yes                 |                                                                   |
| 159     | CD137 (4-1BB)              | After Fc block | BioLegend      | 4B4-1          | 2                              | Yes                 |                                                                   |
| 160     | CD68                       | After Perm-S   | BioLegend      | Y1/82A         | 1                              | Yes                 |                                                                   |
| 161     | CD90                       | After Fc block | Fluidigm       | 5E10           | (1:100)                        | Yes                 |                                                                   |
| 162     | Siglec-8                   | After Fc block | BioLegend      | 7C9            | 2                              | Yes                 |                                                                   |
| 163     | CD209                      | After Fc block | BioLegend      | 14E387         | 2                              | Yes                 |                                                                   |
| 164     | Arginase-1                 | After Perm-S   | Fluidigm       | 658922         | (1:100)                        | Yes                 |                                                                   |
| 165     | MICAM1CB                   | After Fc block | BioLegend      | 6D4            | 4                              | Yes                 |                                                                   |
| 166     | pRb                        | After Perm-S   | Fluidigm       | J112-906       | (1:100)                        | No                  |                                                                   |
| 167     | CD38                       | After Fc block | Fluidigm       | HIT2           | (1:100)                        | Yes                 |                                                                   |
| 168     | CD127 (IL-7Ra)             | After Fc block | Fluidigm       | A019D5         | (1:100)                        | Yes                 |                                                                   |
| 169     | CD25                       | After Fc block | Fluidigm       | 2A3            | (1:100)                        | Yes                 |                                                                   |
| 170     | CD3                        | After Fc block | Fluidigm       | UCHT1          | (1:100)                        | Yes                 |                                                                   |
| 171     | CD304 (BDCA4)              | After Fc block | BioLegend      | 12C2           | 2                              | Yes                 |                                                                   |
| 172     | PD-L2                      | After Fc block | Fluidigm       | 24F.10C12      | (1:100)                        | Yes                 |                                                                   |
| 173     | CD141 (BDCA3)              | After Fc block | Fluidigm       | 1A4            | (1:100)                        | Yes                 |                                                                   |
| 174     | HLA-DR                     | After Fc block | Fluidigm       | L243           | (1:100)                        | Yes                 |                                                                   |
| 175     | PD-L1                      | After Fc block | Fluidigm       | 29E.2A3        | (1:100)                        | Yes                 |                                                                   |
| 176     | CD56                       | After Fc block | Fluidigm       | NCAM16.1       | (1:100)                        | Yes                 |                                                                   |
| 191     | DNA                        | Final step     | Fluidigm       | --             | --                             | No                  | Ir-intercalator                                                   |
| 193     | DNA                        | Final step     | Fluidigm       | --             | --                             | No                  | Ir-intercalator                                                   |
| 194     | Viability                  | Before PFA     | Fluidigm       | --             | --                             | No                  | Cisplatin                                                         |
| 195     | Viability                  | Before PFA     | Fluidigm       | --             | --                             | No                  | Cisplatin                                                         |
| 198     | Viability                  | Before PFA     | Fluidigm       | --             | --                             | No                  | Cisplatin                                                         |
| 209     | CD11b                      | After Fc block | Fluidigm       | ICRF44         | (1:100)                        | Yes                 |                                                                   |

**Table S4 – Mouse CyTOF Antibody Panel**

| Channel | Marker                     | Staining step  | Manufacturer   | Clone       | Staining Concentration (µg/mL) | Used for clustering | Notes                                                                                                |
|---------|----------------------------|----------------|----------------|-------------|--------------------------------|---------------------|------------------------------------------------------------------------------------------------------|
| 89      | CD45                       | After Fc block | BioLegend      | 30-F11      | 0.5                            | Yes                 |                                                                                                      |
| 102     | Cell-ID 20-plex Pd barcode | After thaw     | Fluidigm       | --          | --                             | No                  |                                                                                                      |
| 104     | Cell-ID 20-plex Pd barcode | After thaw     | Fluidigm       | --          | --                             | No                  |                                                                                                      |
| 105     | Cell-ID 20-plex Pd barcode | After thaw     | Fluidigm       | --          | --                             | No                  |                                                                                                      |
| 106     | Cell-ID 20-plex Pd barcode | After thaw     | Fluidigm       | --          | --                             | No                  |                                                                                                      |
| 108     | Cell-ID 20-plex Pd barcode | After thaw     | Fluidigm       | --          | --                             | No                  |                                                                                                      |
| 110     | Cell-ID 20-plex Pd barcode | After thaw     | Fluidigm       | --          | --                             | No                  |                                                                                                      |
| 113     | B220                       | After Fc block | BioLegend      | RA3-6B2     | 0.5                            | Yes                 |                                                                                                      |
| 115     | CD11a                      | After Fc block | UCSF mAb core  | M17/4       | 2                              | Yes                 |                                                                                                      |
| 139     | Ly-6G                      | After Fc block | UCSF mAb core  | 1A8         | 2                              | Yes                 |                                                                                                      |
| 140     | Cleaved PARP               | After Perm-S   | BD Biosciences | F21-852     | 8                              | No                  |                                                                                                      |
| 141     | CD38                       | After Fc block | BioLegend      | 90          | 1                              | Yes                 |                                                                                                      |
| 142     | CD49b (a2 integrin)        | After Fc block | BioLegend      | HMa2        | 0.13                           | Yes                 |                                                                                                      |
| 143     | CD11c                      | After Fc block | BD Biosciences | HL3         | See notes                      | Yes                 | Stained at 2 µg/mL in Figures 6, S6, and S7; 1 µg/mL in all others                                   |
| 144     | GFP                        | After Perm-S   | BioLegend      | FM264G      | 2                              | Yes                 |                                                                                                      |
| 145     | CD27                       | After Fc block | BioLegend      | LG.3A10     | 4                              | Yes                 |                                                                                                      |
| 146     | CD206 (mannose receptor)   | After Fc block | BioLegend      | C068C2      | See notes                      | Yes                 | Stained at 2 µg/mL in Figures 6, S6, and S7; 8 µg/mL in all others                                   |
| 147     | CD274 (PD-L1)              | After Fc block | BioLegend      | 10F.9G2     | 1                              | Yes                 |                                                                                                      |
| 148     | CD103 (aE integrin)        | After Fc block | BioLegend      | 2E7         | 4                              | Yes                 |                                                                                                      |
| 149     | CD152 (CTLA-4)             | After Perm-S   | BioLegend      | UC10-4B9    | 2                              | Yes                 |                                                                                                      |
| 150     | CD317 (PDCA-1)             | After Fc block | BioLegend      | 927         | 2                              | Yes                 |                                                                                                      |
| 151     | Ly-6C                      | After Fc block | BioLegend      | HK1.4       | 0.25                           | Yes                 |                                                                                                      |
| 152     | Ki-67                      | After Perm-S   | eBioscience    | SolA15      | 1                              | No                  |                                                                                                      |
| 153     | CD11b (Mac1)               | After Fc block | UCSF mAb core  | M1/70       | 0.5                            | Yes                 |                                                                                                      |
| 154     | Rb (pS807/S811)            | After Perm-S   | BD Biosciences | J112-906    | 1                              | No                  |                                                                                                      |
| 155     | CD8a                       | After Fc block | BioLegend      | 53-6.7      | 0.5                            | Yes                 |                                                                                                      |
| 156     | CD4                        | After Fc block | BioLegend      | RM4-5       | 0.13                           | Yes                 |                                                                                                      |
| 157     | CD3e                       | After Fc block | BioLegend      | 17A2        | 1                              | Yes                 |                                                                                                      |
| 158     | CD279 (PD-1)               | After Fc block | BioLegend      | 29F.1A12    | 1                              | Yes                 |                                                                                                      |
| 159     | CD31                       | After Fc block | BioLegend      | 390         | 1                              | Yes                 |                                                                                                      |
| 160     | iNOS                       | After Perm-S   | eBioscience    | CXNFT       | 0.5                            | Yes                 | 160Gd-iNOS was used in all figures other than Figure 6, S6, and S7                                   |
| 160     | H-2Ld/H-2Db (MHC-I)        | After Fc block | BioLegend      | 28-14-8     | 4                              | Yes                 | 160Gd-MHC-I was used in Figures 6, S6, and S7                                                        |
| 161     | T-bet                      | After Perm-S   | BD Biosciences | 04-46       | 2                              | Yes                 |                                                                                                      |
| 162     | CD135 (Flt3)               | After Fc block | eBioscience    | A2F10       | 8                              | Yes                 |                                                                                                      |
| 163     | CD62L (L-selectin)         | After Fc block | BioLegend      | MEL-14      | 8                              | Yes                 |                                                                                                      |
| 164     | CD278 (ICOS)               | After Fc block | BioLegend      | C398.4A     | 1                              | Yes                 |                                                                                                      |
| 165     | CD69                       | After Fc block | BioLegend      | H1.2F3      | See notes                      | Yes                 | Stained at 8 µg/mL in Figures 1D, 1E; 4 µg/mL in all others                                          |
| 166     | CD49d (a4 integrin)        | After Fc block | BioLegend      | R1-2        | 0.5                            | Yes                 |                                                                                                      |
| 167     | FoxP3                      | After Perm-S   | BioLegend      | 150D        | 8                              | Yes                 |                                                                                                      |
| 168     | CD25 (IL-2Ra)              | After Fc block | BioLegend      | 3C7         | 8                              | Yes                 |                                                                                                      |
| 169     | F4/80                      | After Fc block | BioLegend      | BM8         | 8                              | Yes                 |                                                                                                      |
| 170     | CD115 (CSF-1R)             | After Fc block | BioLegend      | AFS98       | 8                              | Yes                 |                                                                                                      |
| 171     | CD192 (CCR2)               | After Fc block | BioLegend      | SA203G11    | See notes                      | Yes                 | Stained FITC-anti-CCR2 (10 µg/mL) followed by 171-anti-FITC (BioLegend clone FIT-22, 2 µg/mL)        |
| 172     | KLRG1                      | After Fc block | Tonbo          | 2F1         | 0.5                            | Yes                 |                                                                                                      |
| 173     | CD194 (CCR4)               | After Fc block | BioLegend      | 2G12        | See notes                      | Yes                 | Stained Biotin-anti-CCR4 (10 µg/mL) followed by 173-anti-Biotin (BioLegend clone 1D4-C5, 0.13 µg/mL) |
| 174     | CD197 (CCR7)               | After Fc block | BioLegend      | 4B12        | 8                              | Yes                 |                                                                                                      |
| 175     | CD44                       | After Fc block | BioLegend      | IM7         | 0.06                           | Yes                 |                                                                                                      |
| 176     | CD90                       | After Fc block | BioLegend      | G7          | 0.06                           | Yes                 |                                                                                                      |
| 191     | DNA                        | Final step     | Fluidigm       | --          | --                             | No                  | Ir-intercalator                                                                                      |
| 193     | DNA                        | Final step     | Fluidigm       | --          | --                             | No                  | Ir-intercalator                                                                                      |
| 194     | Viability                  | Before PFA     | Fluidigm       | --          | --                             | No                  | Cisplatin                                                                                            |
| 195     | Viability                  | Before PFA     | Fluidigm       | --          | --                             | No                  | Cisplatin                                                                                            |
| 198     | Viability                  | Before PFA     | Fluidigm       | --          | --                             | No                  | Cisplatin                                                                                            |
| 209     | I-A/I-E (MHC II)           | After Fc block | BioLegend      | M5/114.15.2 | 0.06                           | Yes                 |                                                                                                      |

**Table S5 – Mouse Tumor Inoculation Details**

| Cell Line     | # of Cells | Injection Volume (uL) | Matrigel?     | Route         | Figures  | Experiment IDs                 |
|---------------|------------|-----------------------|---------------|---------------|----------|--------------------------------|
| SB28-Parental | 50,000     | 2                     | No            | Intracerebral | 2B, 2D-F | 170814                         |
| SB28-Parental | 500,000    | 100                   | No            | Subcutaneous  | 2C-F     | 180815                         |
| SB28-Parental | 1,600      | 2                     | No            | Intracerebral | 3B       | 180123                         |
| SB28-Parental | 500,000    | 100                   | Yes (50% v/v) | Subcutaneous  | 3C-E     | 170810, 171129, 181209         |
| SB28-OVA FL   | 1,000      | 2                     | No            | Intracerebral | 4        | 180302                         |
| SB28-OVA FL   | 500,000    | 100                   | No            | Subcutaneous  | 4        | 180302                         |
| SB28-Parental | 1,600      | 2                     | No            | Intracerebral | 5, 6     | 180301, 180613, 180808, 190424 |

Table S6 – Mouse Treatment Details

| Treatment                                                                   | Clone   | Manufacturer  | Catalog Number | Dose (per mouse)   | Route | Treatment Schedule                                                                                                           | Reference                                                                     |
|-----------------------------------------------------------------------------|---------|---------------|----------------|--------------------|-------|------------------------------------------------------------------------------------------------------------------------------|-------------------------------------------------------------------------------|
| anti-CD4                                                                    | GK1.5   | BioXcell      | BE0003-1       | 250 µg             | i.p.  | Days -3, -2, -1, then twice weekly                                                                                           | Smith et al Oncoimmunology 2016 (PMID: 28197381)                              |
| anti-CD8a                                                                   | 2.43    | BioXcell      | BE0061         | 250 µg             | i.p.  | Days -3, -2, -1, then twice weekly                                                                                           | Smith et al Oncoimmunology 2016 (PMID: 28197381)                              |
| anti-NK1.1                                                                  | PK136   | BioXcell      | BE0036         | 250 µg             | i.p.  | Days -3, -2, -1, then twice weekly                                                                                           | Smith et al Oncoimmunology 2016 (PMID: 28197381)                              |
| anti-CD40L (CD154)                                                          | MR-1    | BioXcell      | BP0017-1       | 500 µg             | i.p.  | Twice weekly beginning Day 0                                                                                                 | Brasseit et al. Mucosal Immunology 2016 (PMID: 26376366)                      |
| anti-CTLA-4                                                                 | 9H10    | BioXcell      | BE0131         | 200 µg             | i.p.  | Every 2-3 days beginning Day 7 unless otherwise specified in the figure                                                      | Twyman-Saint Victor et al Nature 2015 (PMID: 25754329)                        |
| anti-PD-1                                                                   | RMP1-14 | BioXcell      | BE0146         | 200 µg             | i.p.  | Every 2-3 days beginning Day 7 unless otherwise specified in the figure                                                      | Twyman-Saint Victor et al Nature 2015 (PMID: 25754329)                        |
| anti-PD-L1                                                                  | 10F.9G2 | BioXcell      | BE0101         | 500 µg then 200 µg | i.p.  | In Figure 5 & SSC: 500 µg on Day 4 then 200 µg on Days 7, 10 13; in Figure S5D: 500µg on Day 7 then 200µg on Days 10, 13, 16 | Wainwright et al 2014 (PMID 24691018)                                         |
| Ctrl IgG (mouse IgG2a isotype control for anti-NK1.1)                       | C1.18.4 | BioXcell      | BE0085         | 250 µg             | i.p.  | Days -3, -2, -1, then twice weekly                                                                                           | Smith et al Oncoimmunology 2016 (PMID: 28197381)                              |
| Ctrl IgG (polyclonal Armenian hamster IgG control for anti-CD40L)           | --      | BioXcell      | BP0091         | 500 µg             | i.p.  | Twice weekly beginning Day 0                                                                                                 | Brasseit et al. Mucosal Immunology 2016 (PMID: 26376366)                      |
| Ctrl IgG (hIgG1 control for huFli3L-Fc)                                     | --      | BioXcell      | BE0096         | 10 µg              | i.p.  | Daily on Day 1 through Day 10                                                                                                | Swee et al 2009 (PMID 19211508), although they used rFLT3L (human) from Amgen |
| Ctrl IgG (rat IgG1 isotype control for anti-CD25)                           | --      | BioXcell      | BE0088         | 200 µg             | i.p.  | Days 5 and 7                                                                                                                 | Vargas et al 2017 (PMID 28410988)                                             |
| Ctrl IgG (rat IgG2a isotype control for anti-CTLA-4)                        | --      | BioXcell      | BE0089         | 200 µg             | i.p.  | Every 2-3 days beginning Day 7                                                                                               |                                                                               |
| Ctrl IgG (rat IgG2b isotype control for anti-PD-L1, anti-CD4, and anti-CD8) | --      | BioXcell      | BE0090         | 500 µg then 200 µg | i.p.  | In Figure 5 & SSC: 500 µg on Day 4 then 200 µg on Days 7, 10 13; in Figure S5D: 500µg on Day 7 then 200µg on Days 10, 13, 16 | Wainwright et al 2014 (PMID 24691018)                                         |
| Ctrl IgG (Syrian hamster IgG control for anti-PD-1)                         | --      | BioXcell      | BE0087         | 200 µg             | i.p.  | Every 2-3 days beginning Day 7                                                                                               |                                                                               |
| huFli3L-Fc                                                                  | --      | BioXcell      | BE0098         | 10 µg              | i.p.  | Daily on Day 1 through Day 10                                                                                                | Swee et al 2009 (PMID 19211508), although they used rFLT3L (human) from Amgen |
| Poly-ICLC                                                                   | --      | Oncovir, Inc. | --             | 20 µg              | i.m.  | Twice per week from Day 2 through Day 30                                                                                     | Zhu et al 2010 (PMID 20549206)                                                |
| XRT radiation (1 x 10 Gy)                                                   | --      | --            | --             | 1 x 10 Gy          | --    | On Day 10                                                                                                                    | Zeng et al 2013 (PMID 23462419)                                               |
| XRT radiation (3 x 8 Gy)                                                    | --      | --            | --             | 3 x 8 Gy           | --    | On Days 5, 7, 9                                                                                                              | Zeng et al 2013 (PMID 23462419)                                               |

**Table S7 – Mouse Flow Cytometry Antibody Panel**

| Figure panel(s) | Fluorophore  | Marker                        | Staining step                                  | Manufacturer      | Clone       | Staining Concentration (µg/mL) | Catalog Number |
|-----------------|--------------|-------------------------------|------------------------------------------------|-------------------|-------------|--------------------------------|----------------|
| 4E, S4J-K       | BV421        | CD45                          | After Fc block                                 | BioLegend         | 30-F11      | 2.5                            | 103134         |
| 4E, S4J-K       | BV605        | CD103                         | After Fc block                                 | BioLegend         | 2E7         | 0.6                            | 121433         |
| 4E, S4J-K       | PerCP-Cy5.5  | I-A/I-E (MHC II)              | After Fc block                                 | BioLegend         | M5/114.15.2 | 5                              | 107625         |
| 4E, S4J-K       | PE           | CD8                           | After Fc block                                 | BioLegend         | 53-6.7      | 1.25                           | 100707         |
| 4E, S4J-K       | PE-Cy7       | CD3e                          | After Fc block                                 | BioLegend         | 145-2C11    | 5                              | 100320         |
| 4E, S4J-K       | APC          | H-2Kb bound to SIINFEKL       | After Fc block                                 | BioLegend         | 25-D1.16    | 10                             | 141605         |
| 4E, S4J-K       | APC          | MHC tetramer (SIINFEKL)       | After Fc block                                 | MBL International | --          | Diluted 1:12                   | TB-5001-2      |
| 4C-D, S4D-I     | BV510        | CD4                           | After Fc block                                 | BD                | RM4-5       | 2                              | 563106         |
| 4C-D, S4D-I     | BV421        | CD3e                          | After Fc block                                 | BD                | 145-2c11    | 2                              | 562600         |
| 4C-D, S4D-I     | APC-Cy7      | CD8                           | After Fc block                                 | BD                | 53-6.7      | 2                              | 557654         |
| 4C-D, S4D-I     | PE-Cy7       | CD45                          | After Fc block                                 | BioLegend         | 30-F11      | 1                              | 103114         |
| 4C-D, S4D-I     | PE-Dazzle594 | Ki67                          | After Fc block + True-Nuclear permeabilization | BioLegend         | 16A8        | 4                              | 652427         |
| 4C-D, S4D-I     | PE           | MHC tetramer (SIINFEKL)       | After Fc block                                 | MBL International | --          | Diluted 1:50                   | TB-5001-1      |
| 4C-D, S4D-I     | APC          | MHC tetramer I-Ab OVA 323-339 | After Fc block                                 | MBL International | --          | Diluted 1:50                   | TS-M710-2      |
