# Supplementary material for: Deep immune profiling reveals targetable mechanisms of immune evasion in immune checkpoint inhibitor-refractory glioblastoma
Source: PubMed Central journal article supplement (PMC8183210; doi:10.1136/jitc-2020-002181), 2021-06-02

### Figure S3

**A**

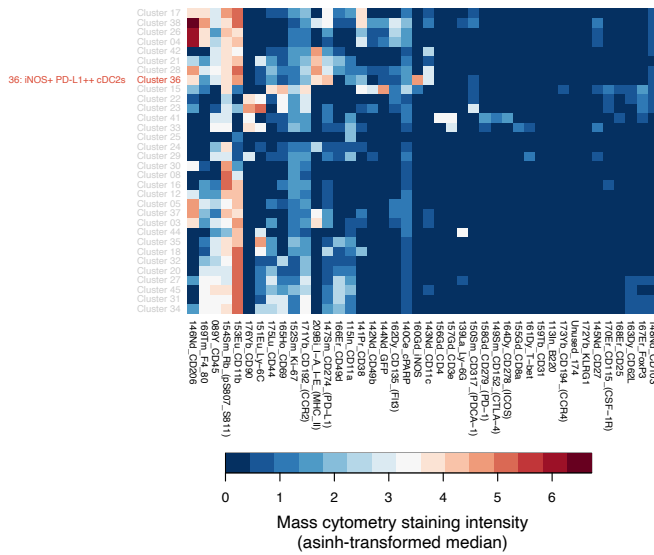

**B**

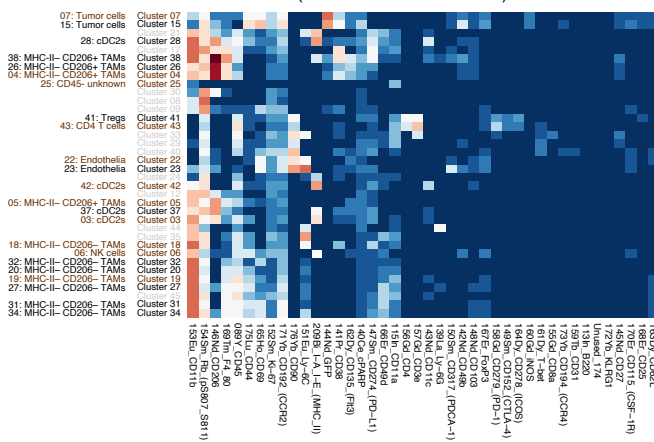

**D**

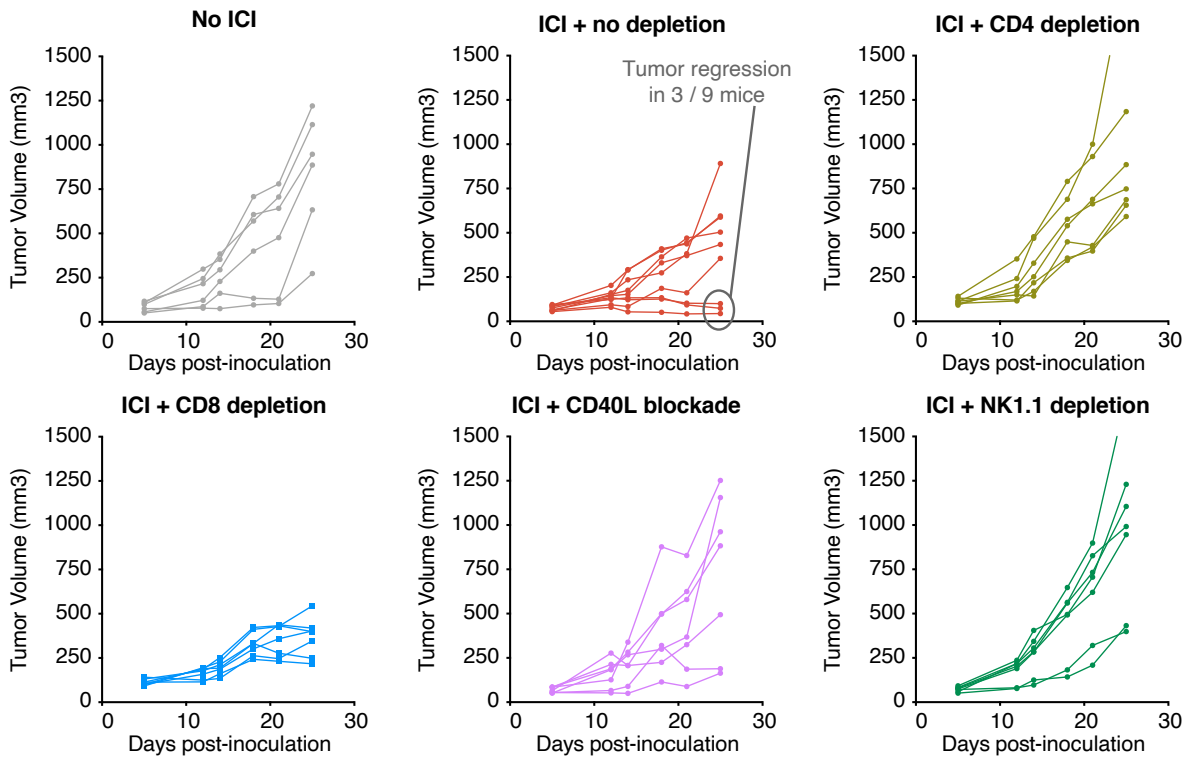

**C**

Gated on CD3+ splenocytes:

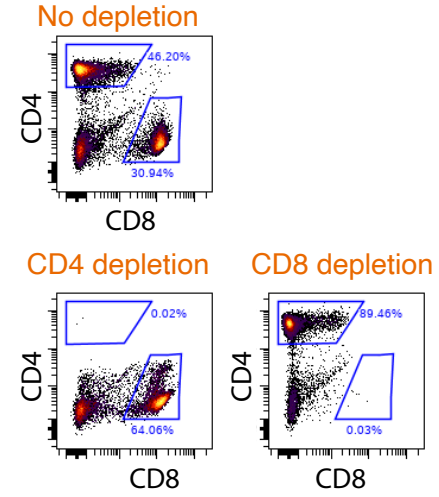

Gated on CD3- splenocytes

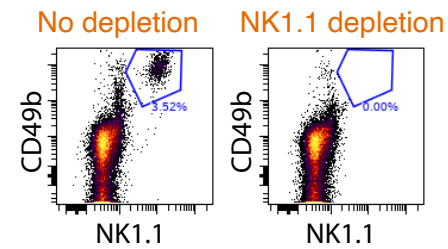

Supplement: jitc-2020-002181supp005.pdf [file jitc-2020-002181supp005.pdf]
