# Supplementary material for: Deep immune profiling reveals targetable mechanisms of immune evasion in immune checkpoint inhibitor-refractory glioblastoma
Source: PubMed Central journal article supplement (PMC8183210; doi:10.1136/jitc-2020-002181), 2021-06-02

# Figure S4

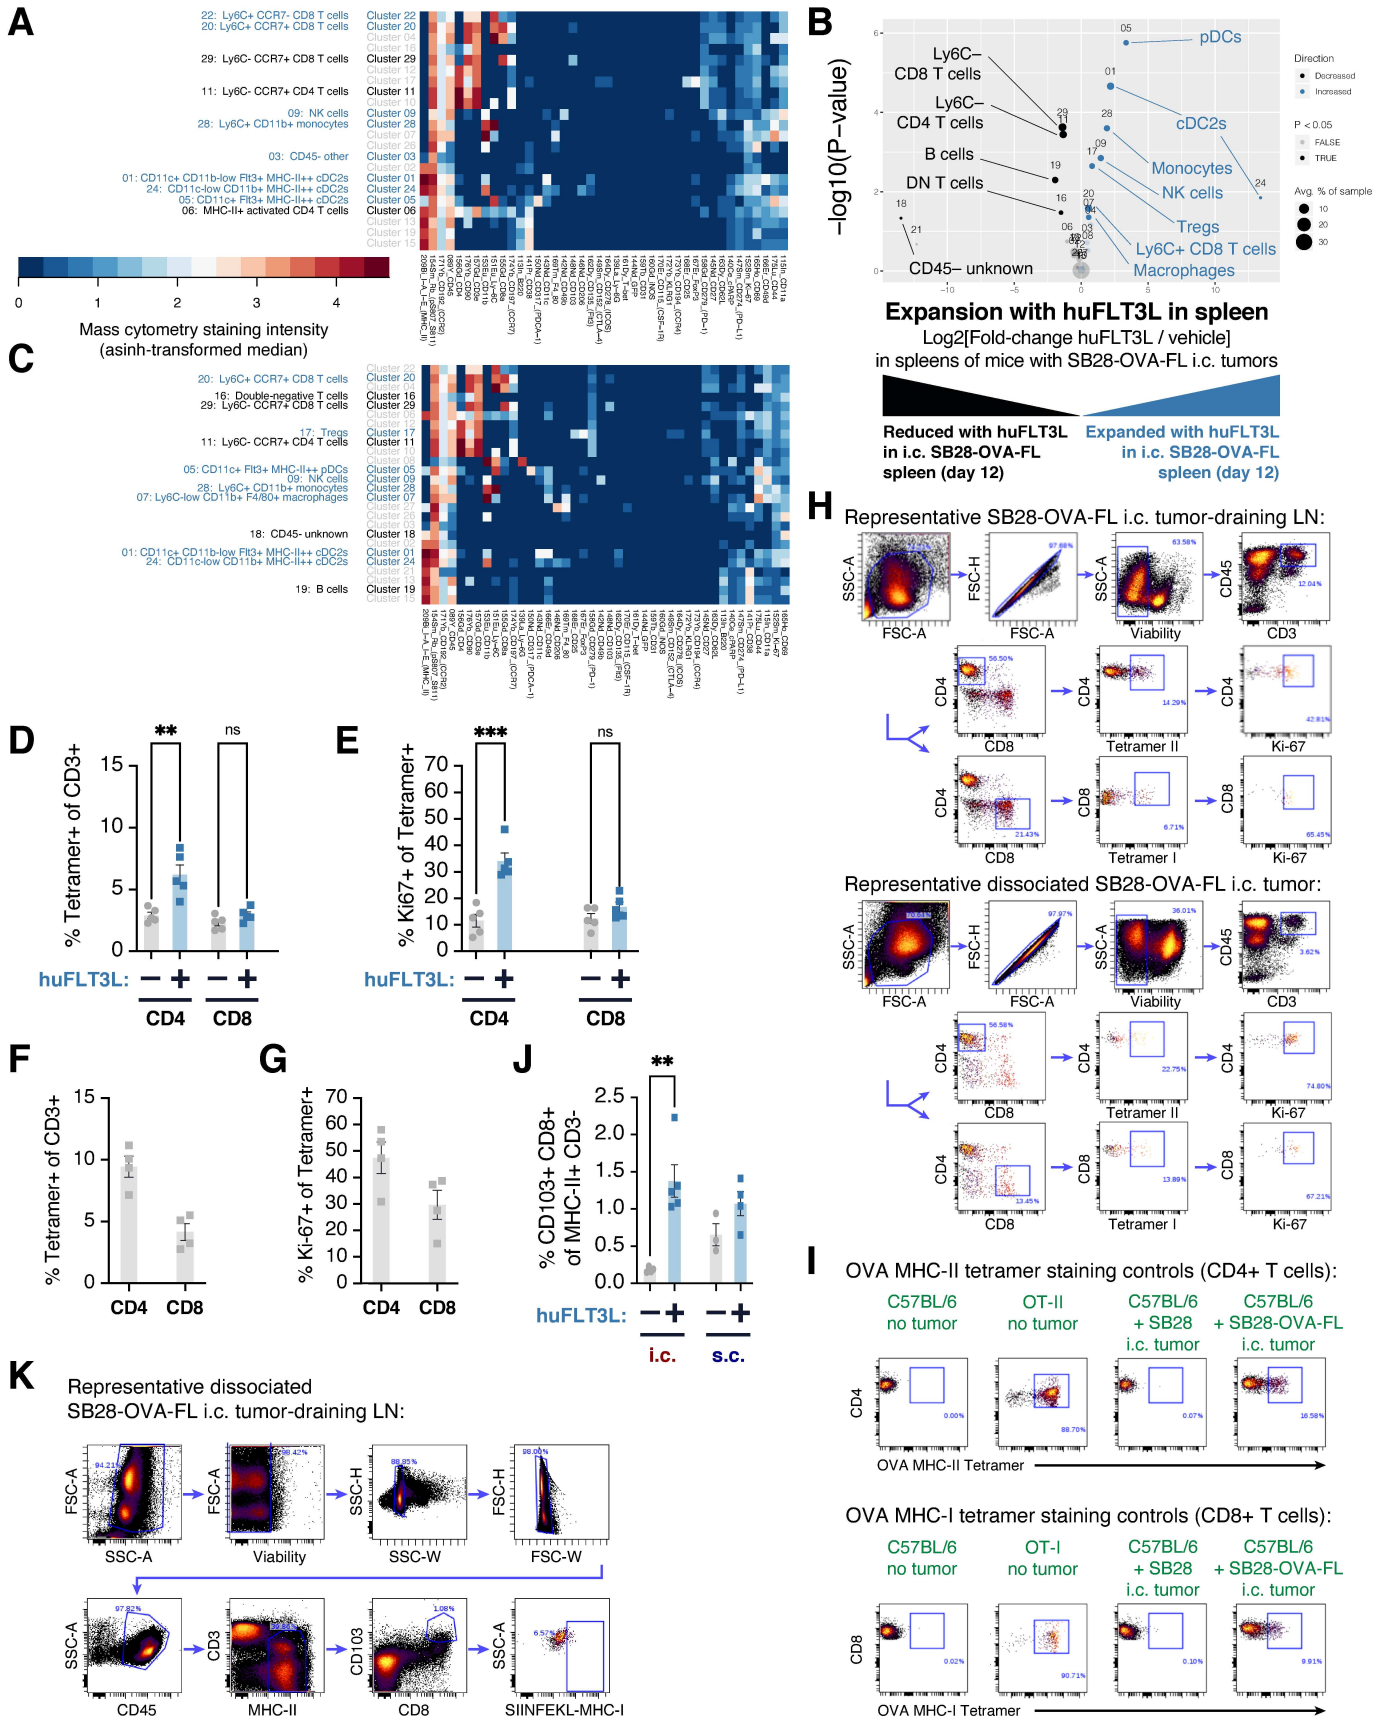

Supplement: jitc-2020-002181supp006.pdf [file jitc-2020-002181supp006.pdf]
