# Supplementary figures and images for: Deep immune profiling reveals targetable mechanisms of immune evasion in immune checkpoint inhibitor-refractory glioblastoma
Source: HighWire-hosted journal article supplement (doi:10.1136/jitc-2020-002181), 2021-06-01

# Figure S2

**A**

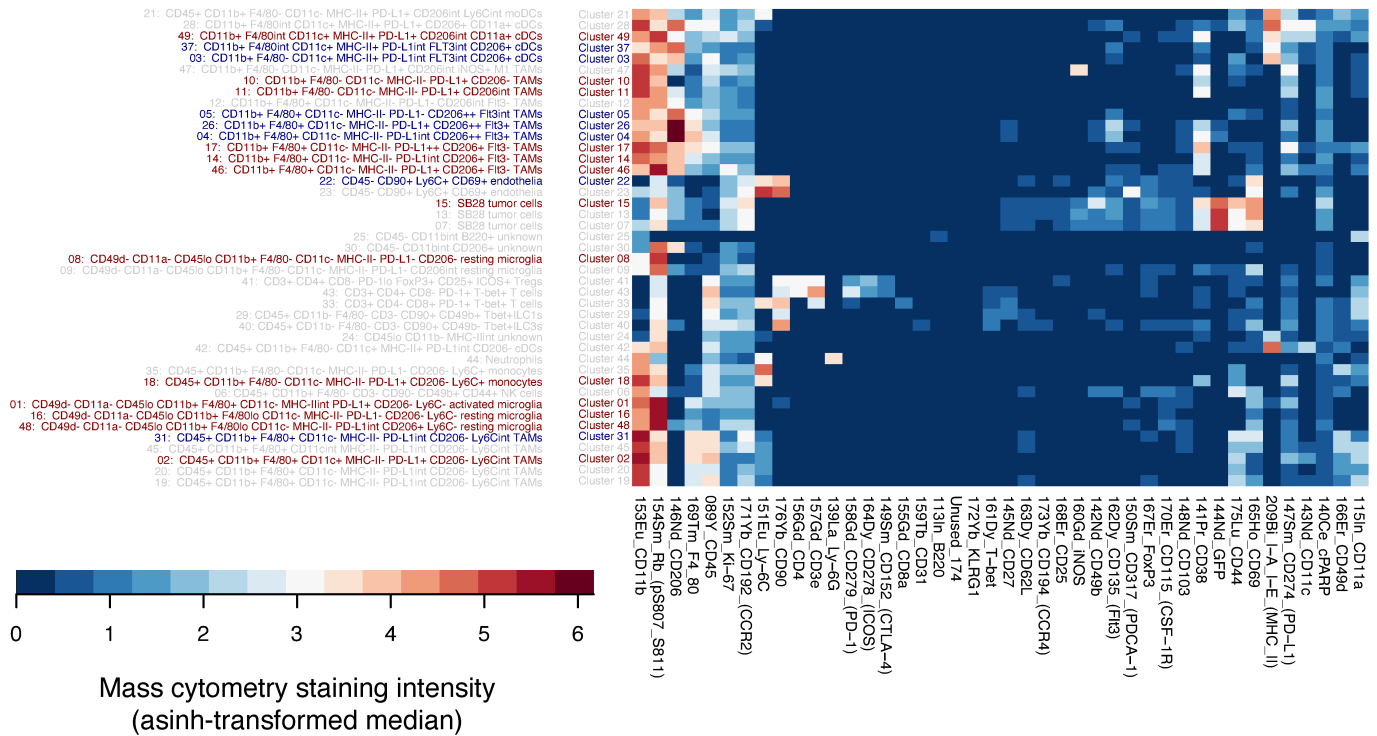

**B**

Gating strategy for TAM subsets (one representative i.c. tumor is shown):

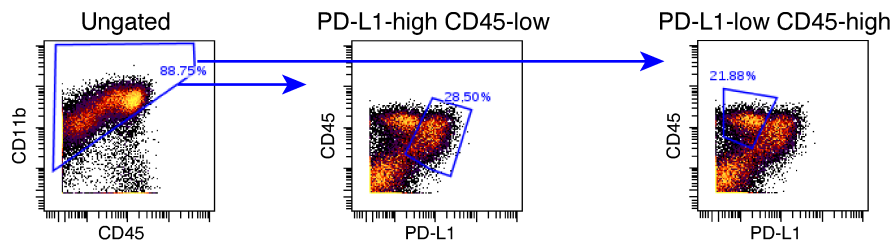

**C**

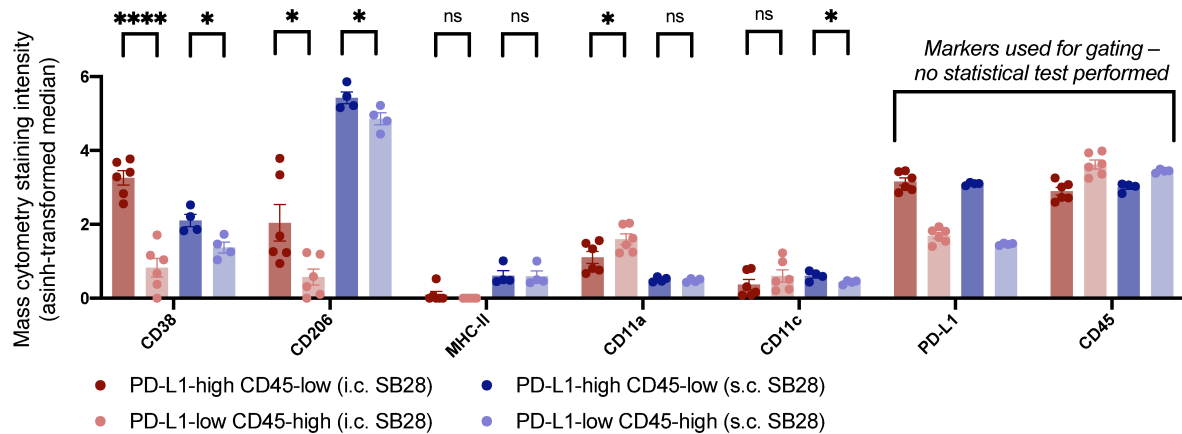

Supplement: jitc-2020-002181supp005_data_supplement.pdf [file jitc-2020-002181supp005_data_supplement.pdf]
